# Supplementary figures and images for: Surgical care for the aged: a retrospective cross-sectional study of a national surgical mortality audit
Source: HighWire-hosted journal article supplement (doi:10.1136/bmjopen-2014-006981), 2015-04-01

**Supplement 1: Australian and New Zealand Audit of Surgical Mortality process**

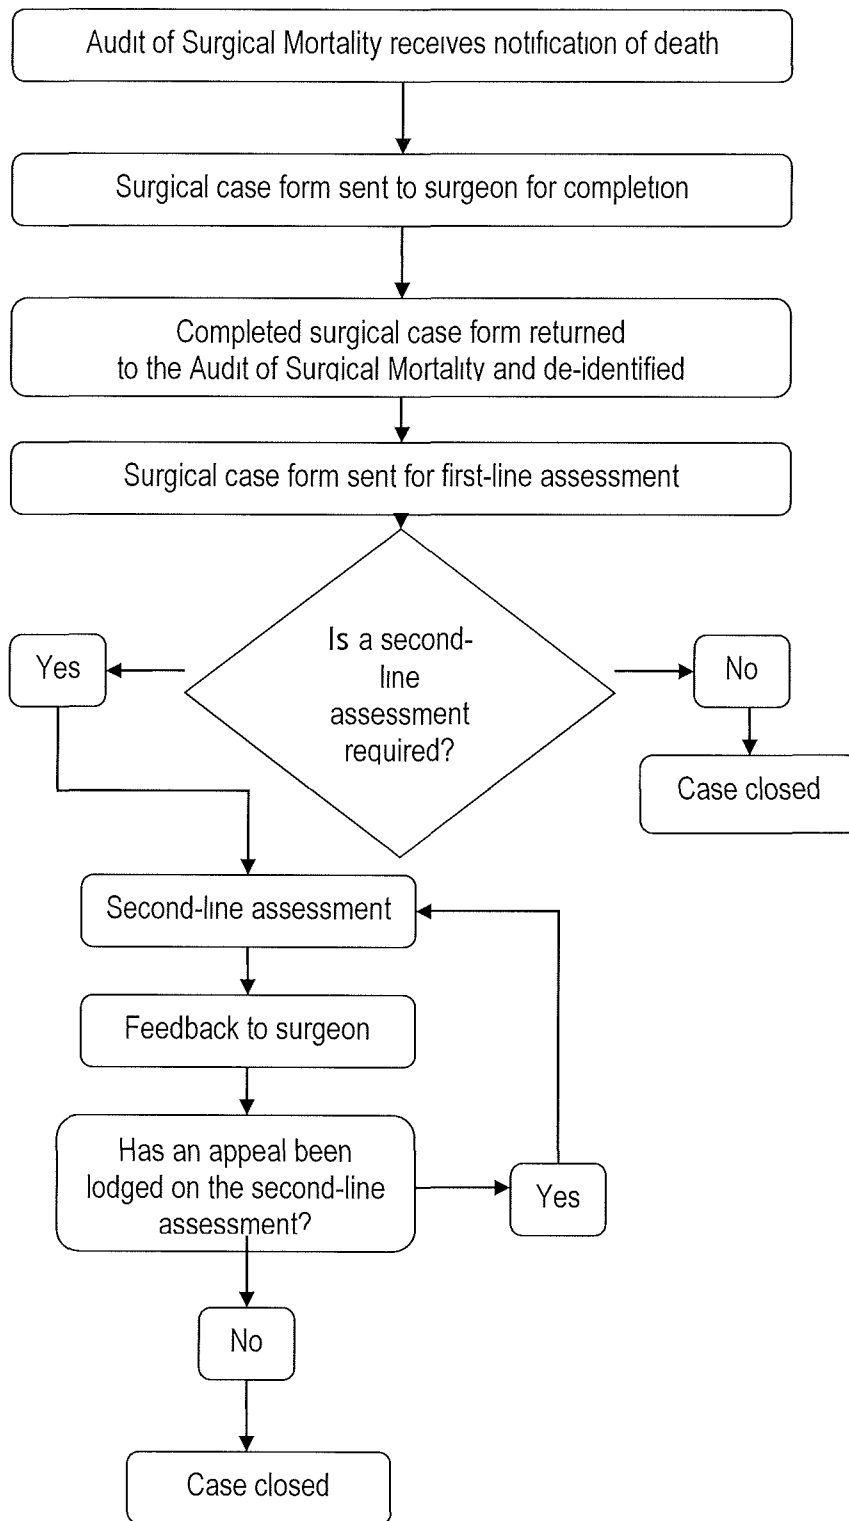

Supplement: bmjopen-2014-006981supp1.pdf [file bmjopen-2014-006981supp1.pdf]
